# Supplementary material
Source: Springer Nature journal article supplement (https://www.springermedizin.de/resource/supplementary/12939_2006_69_MOESM1_ESM.pdf/9551422)

**Under-5 mortality**

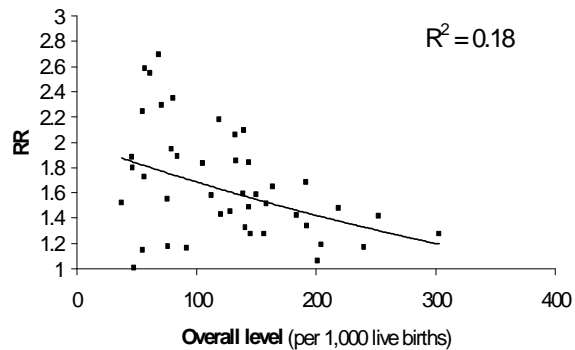

**A**

**Immunisation coverage**

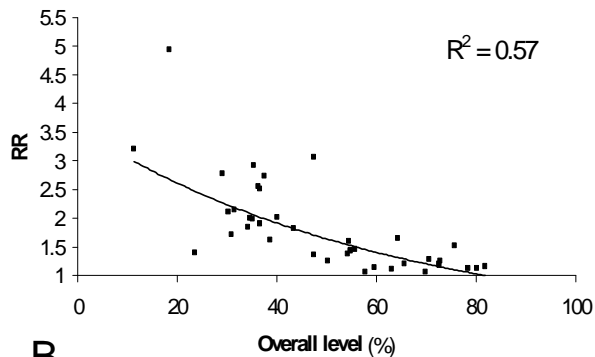

**B**

**Skilled delivery attendance**

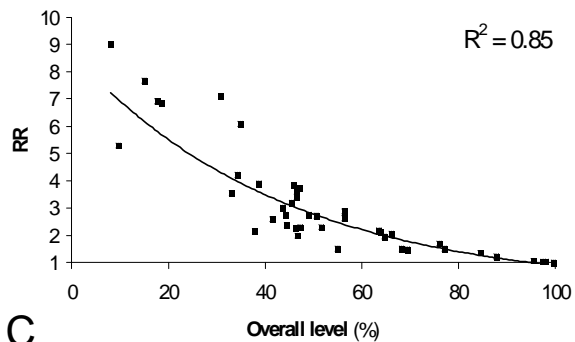

**C**

**Antenatal care**

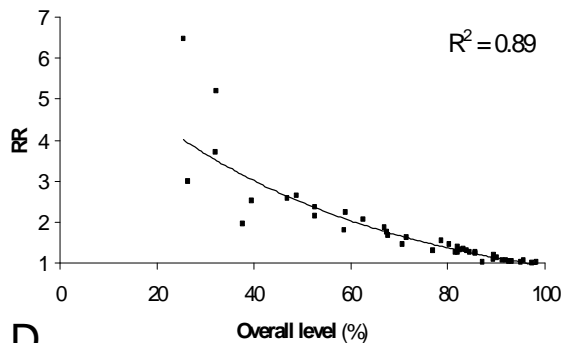

**D**

Supplement: MOESM1 [file 9551422]
